# Supplementary material for: Mesenchymal Stem Cell Microvesicles Restore Protein Permeability Across Primary Cultures of Injured Human Lung Microvascular Endothelial Cells
Source: PubMed Central journal article supplement — Stem Cells Transl Med. 2018 May 8;7(8):615–24. doi: 10.1002/sctm.17-0278 (PMC6090509; doi:10.1002/sctm.17-0278), 2018-05-08

## Supplementary Figure 1A

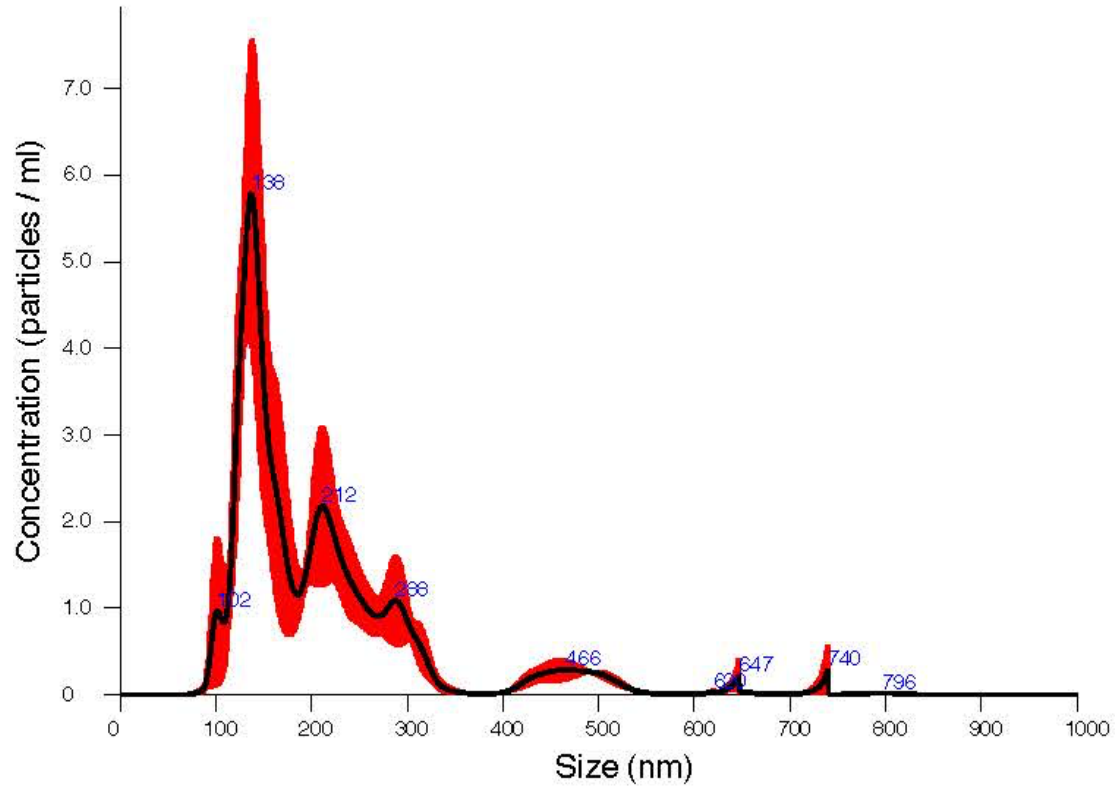

Stats: Merged Data

Mean: 209.6 nm  
Mode: 137.1 nm  
SD: 109.2 nm  
D10: 123.7 nm  
D50: 171.0 nm  
D90: 309.8 nm

Stats: Mean +/- Standard Error

Mean: 209.7 +/- 7.2 nm  
Mode: 133.9 +/- 5.2 nm  
SD: 108.2 +/- 8.4 nm  
D10: 122.8 +/- 5.2 nm  
D50: 173.1 +/- 6.8 nm  
D90: 316.6 +/- 12.4 nm  
Concentration (Upgrade): 4.54e+008 +/- 5.90e+006 particles/ml  
27.6 +/- 0.8 particles/frame  
28.7 +/- 1.0 centres/frame

## Supplementary Figure 1B

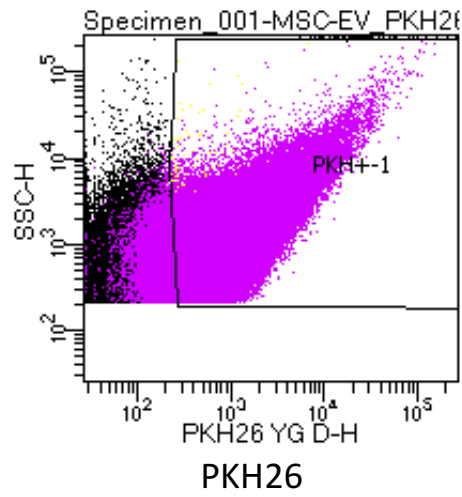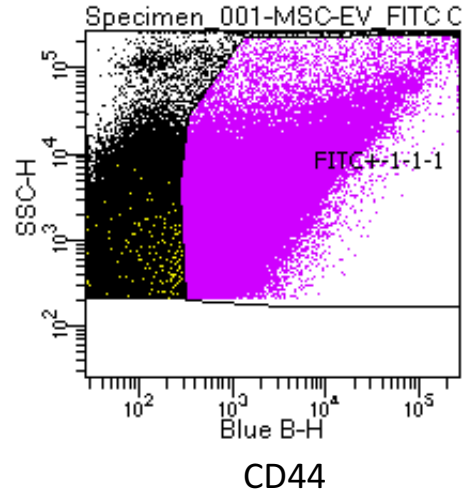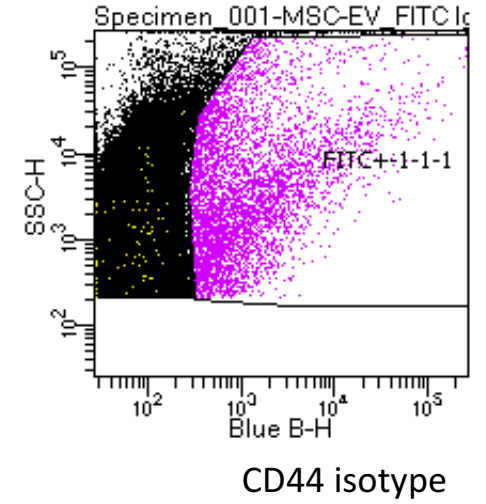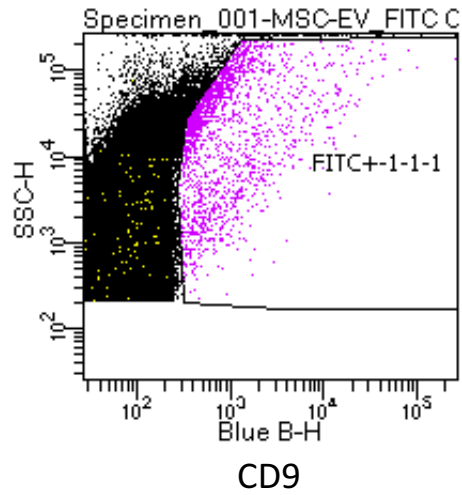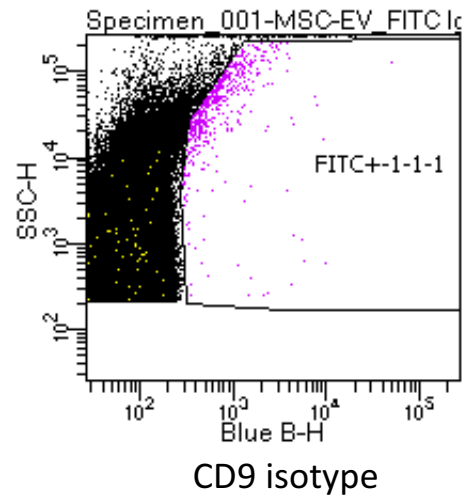

Supplement: SCT3-7-615-s001.pdf [file SCT3-7-615-s001.pdf]
