# Supplementary figures and images for: Mesenchymal Stem Cell Microvesicles Restore Protein Permeability Across Primary Cultures of Injured Human Lung Microvascular Endothelial Cells
Source: PubMed Central journal article supplement — Stem Cells Transl Med. 2018 May 8;7(8):615–24. doi: 10.1002/sctm.17-0278 (PMC6090509; doi:10.1002/sctm.17-0278), 2018-05-08

Supplementary Figure 2A

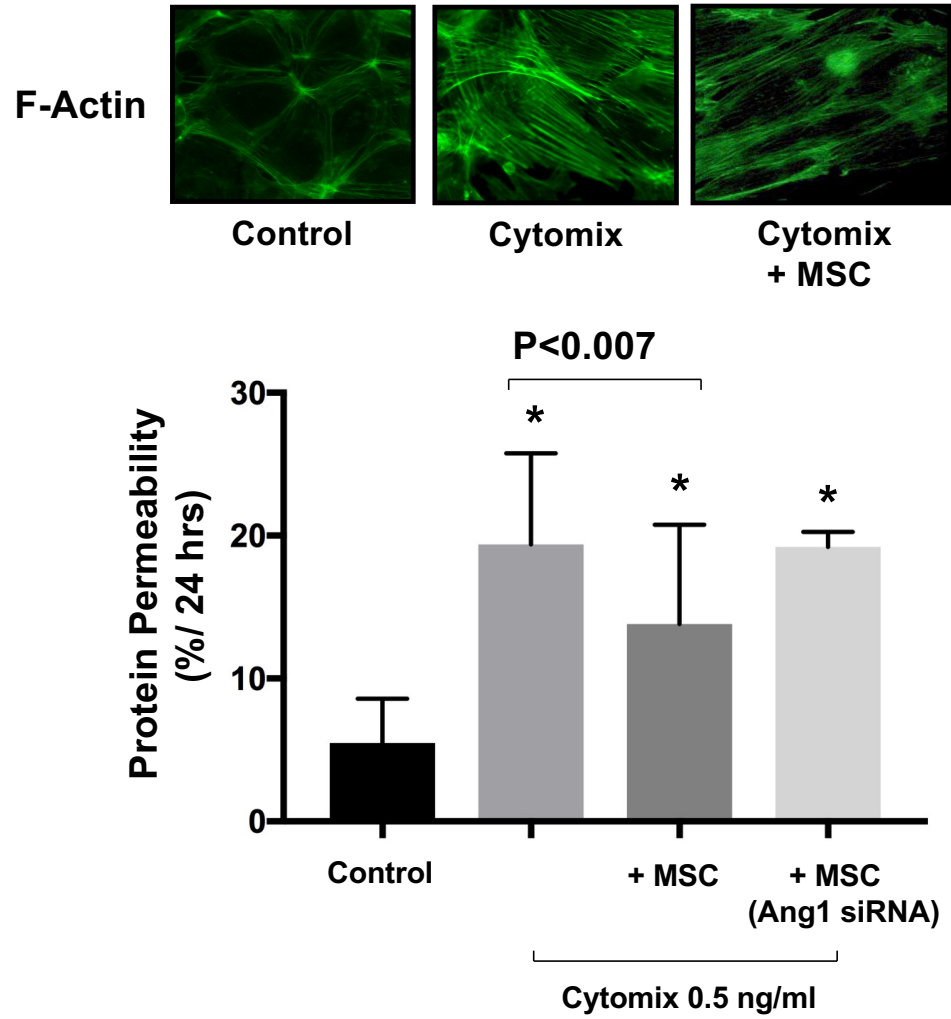

Supplementary Figure 2B

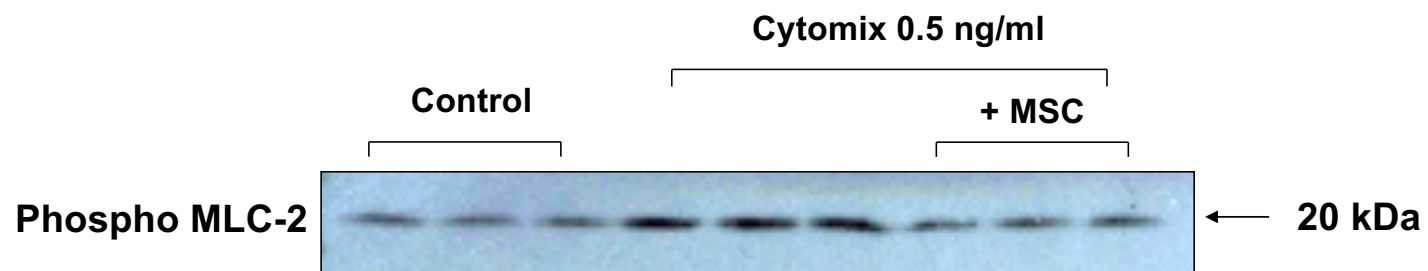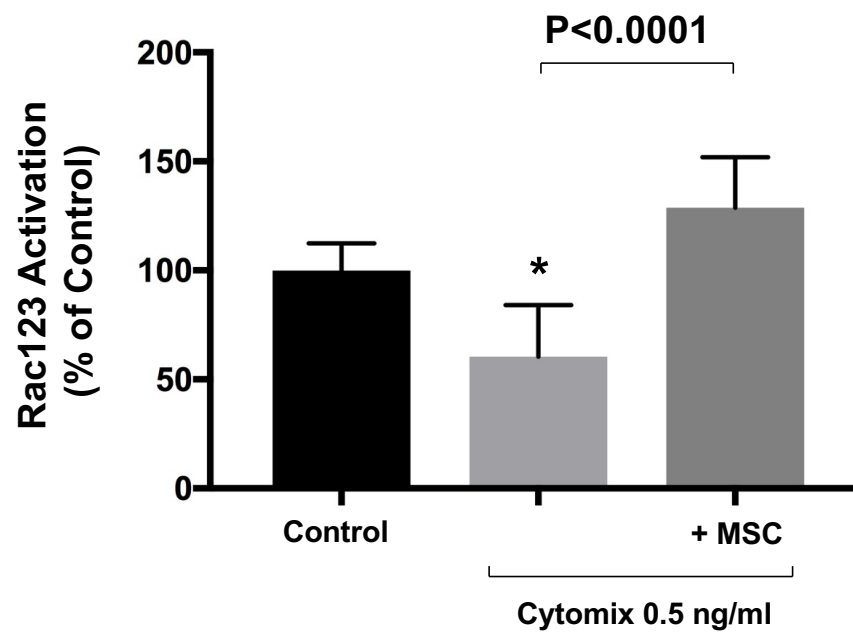

Supplement: SCT3-7-615-s002.pdf [file SCT3-7-615-s002.pdf]

### Supplementary Figure 3

**A**

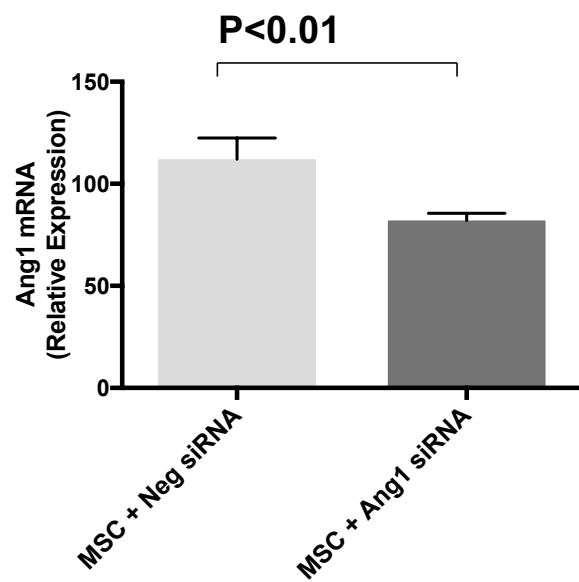

**B**

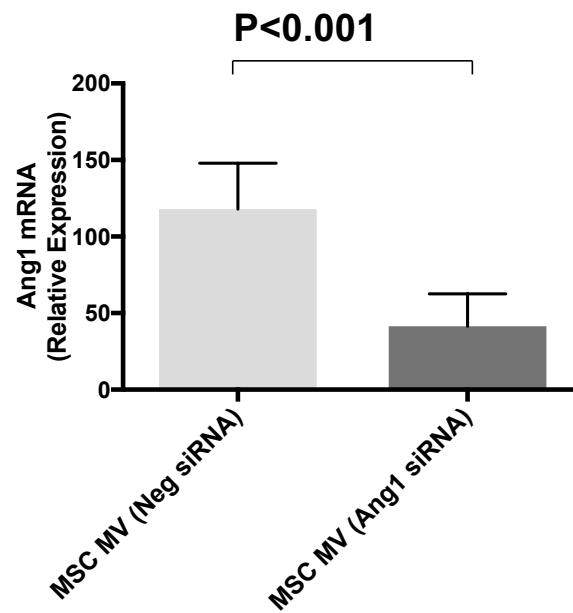

Supplement: SCT3-7-615-s003.pdf [file SCT3-7-615-s003.pdf]
